RESEARCH ARTICLE

# Application of calibrated forceps for assessing mechanical nociception with high time resolution in mice

Hideki Kashiwadani<sup>1\*</sup>, Yuichi Kanmura<sup>2</sup>, Tomoyuki Kuwaki<sup>1</sup>

**1** Department of Physiology, Graduate School of Medical and Dental Sciences, Kagoshima University, Kagoshima, Japan, **2** Department of Anesthesiology, Graduate School of Medical and Dental Sciences, Kagoshima University, Kagoshima, Japan

\* [danny@m3.kufm.kagoshima-u.ac.jp](mailto:danny@m3.kufm.kagoshima-u.ac.jp)

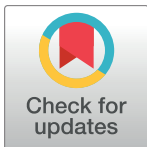

**OPEN ACCESS**

**Citation:** Kashiwadani H, Kanmura Y, Kuwaki T (2017) Application of calibrated forceps for assessing mechanical nociception with high time resolution in mice. PLoS ONE 12(2): e0172461. doi:10.1371/journal.pone.0172461

**Editor:** Maria Gulinello, Yeshiva University Albert Einstein College of Medicine, UNITED STATES

**Received:** May 31, 2016

**Accepted:** February 6, 2017

**Published:** February 17, 2017

**Copyright:** © 2017 Kashiwadani et al. This is an open access article distributed under the terms of the [Creative Commons Attribution License](https://creativecommons.org/licenses/by/4.0/), which permits unrestricted use, distribution, and reproduction in any medium, provided the original author and source are credited.

**Data Availability Statement:** All relevant data are within the paper.

**Funding:** This study was supported by a grant from the Cosmetology Research Foundation (#J-13-12, <http://www.cosmetology.or.jp/index.html>) (HK) and JSPS KAKENHI 16H05130 (<http://www.jspss.go.jp/english/index.html>) (TK). The funders had no role in study design, data collection and analysis, decision to publish, or preparation of the manuscript.

**Competing interests:** The authors have declared that no competing interests exist.

## Abstract

In order to investigate the basic physiological mechanisms of pain and the anti-nociceptive effects of analgesics, development of pain assays in mice is critical due to the advances of genetic manipulation techniques. The von Frey hairs/Semmes-Weinstein monofilaments test (von Frey test) has long been applied to examine mechanical nociception in mice. Though the von Frey test is a well-established and standardized method, it is inappropriate to assess a rapid change in the nociceptive threshold because voluntary resting/sleeping states are necessary to examine the response. In this study, we assessed the effectiveness of calibrated forceps to determine the mechanical nociceptive threshold in mice. Repeated daily measurements of the threshold over 5 days indicated that the device obtained stable and reliable values. Furthermore, repeated measurements with 5 minute intervals revealed that the device detected the rapid change of the threshold induced by remifentanyl, a short-acting  $\mu$ -receptor agonist. These results indicate that the calibrated forceps are well-suited for measuring the mechanical nociceptive threshold in mice, and are useful in assessing the effects of short-acting analgesics on mechanical nociception.

## Introduction

In clinical anesthesia, short-acting analgesics are gaining importance recently because they allow for quick and on-demand control of the depth of anesthesia and enable swift recovery. However, the basic research of short-acting analgesics for mechanical pain was only limited and the evaluation was mainly performed for thermal pain because the established protocols for assessing the mechanical nociception has low time resolution (>30 minutes). Therefore the new techniques for mechanical nociception with high time resolution (< 5minutes) has been required.

When investigating the mechanisms of nociception and the effects of anti-nociceptive drugs pre-clinically, some of the most common techniques include determining the threshold and measuring the duration of behavioral responses to nociceptive stimulation in rodents [1]. Nociceptive tests have long been performed mainly in rat. However, the mouse models of

nociception have recently increased due to the development of genetic engineering techniques in mice [2].

Distinct populations of peripheral nociceptors and central nociceptive neurons are involved in nociceptive information processing depending on the nociceptive modality [3], so it is important to evaluate the effects of analgesics respectively to those modalities. Though there are various types of nociceptive tests, most are classified into three modality categories: thermal, chemical, and mechanical [4]. For investigating the thermal nociceptive threshold, the tail flick test [5], the hot plate test [6, 7], and the plantar test [8] are well developed, and for investigating chemical nociception, the formalin test is most common [9, 10]. The nociceptive tests for thermal and chemical stimulation are well characterized and standardized in both rats and mice [4].

The von Frey hairs/Semmes-Weinstein monofilaments test (von Frey test) and the Randall-Selitto test are commonly used to examine mechanical nociception in both mice and rats. The von Frey test consists of filaments made of plastic fibers that exert a calibrated pressure depending on their diameter [11]. To determine the nociceptive threshold using the von Frey test, repeated measurements using several filaments with different diameters (thus different calibrated pressures) are necessary [11]. However, although the mouse is unrestrained, the voluntary change in behavioral states during measurements cannot be controlled even though they significantly affect the threshold [12]. As a result, the von Frey test requires an extended experimental duration and is inappropriate for examining a rapid change in the nociceptive threshold, even though the von Frey test is superior in terms of the restraint-free method. Electronic von Frey devices that reduce the necessary time for determining the threshold have been developed, but the demand for voluntary resting/sleeping states remains an issue. In the Randall-Selitto test, the hind paw of a rat is placed on a stable base and a controlled pressure is applied with a blunt point [13]. Though the test gives stable results [14], it demands a high proficiency in behavioral experimentation and a large number of animals [4]. Moreover, the subject is restrained in a vertical, unnatural position in order to place its hind paw on the apparatus, so extensive acclimatization is required to obtain reliable values [14, 15]. These two tests measure mechanical nociception at fairly low time resolution, so there remains a need to develop new techniques that can measure at a higher resolution (< 5 minutes).

Recently, as an alternate procedure to the Randall-Selitto test, a new algometer using calibrated forceps has been developed [16–18]. Luis-Delgado and her colleagues reported that the calibrated forceps could measure the mechanical threshold more reliably, easily, quickly, reproducibly, and more reliably than the classical von Frey test in rats [16]. Furthermore, several researchers have recently reported a steady-state mechanical nociceptive threshold using the device [19–21]. Thus we hypothesized that we could use calibrated forceps to detect a rapid change in the mechanical nociceptive threshold of mice caused a short-acting analgesic with high time resolution.

In this study, we measured the behavioral response threshold to noxious mechanical stimuli using calibrated forceps on the tails of mice. The data indicated that the device gave reliable and stable values for the threshold. Furthermore, the device detected the rapid change in the threshold induced by subcutaneous injection of remifentanyl, a short-acting analgesic [22, 23]. These results suggest that the calibrated forceps may be useful to assess the relatively quick (within an hour) change of the nociceptive threshold in mice.

## Materials and methods

### Animals

Male C57BL/6 mice (28.0 to 39.0 g, n = 36) were originally purchased from the Kyudo Company (Tosu, Saga, Japan). Mice were housed in an environment maintained at  $25 \pm 1^\circ\text{C}$  with

free access to food and water under a 12 h light-dark cycle with lights on from 7:00 to 19:00. Experiments were performed between 14:00 and 19:00. Mice were euthanized after the behavioral test session by cervical dislocation under deep urethane anesthesia. All experiments were performed in accordance with The Physiological Society of Japan's guidelines and were approved by the Experimental Animal Research Committee of Kagoshima University.

If not otherwise specified, all animals were acclimatized over 5 days (2–3 hours acclimatization to experiment room, 2 minutes handling, and 2 minutes loose-restraining with a towel). On experiment days, mice were moved to the experiment room 2 hours prior to the start of the experiment.

## Calibrated forceps

A commercially available algometer (Rodent Pincher-analgesia meter, Bioseb, Pinellas Park, USA) using calibrated forceps (11.25 cm long, one arm has a flattened end and the other arm has a smooth slug ( $\varphi = 3.5$  mm) attached to the end) was used.

To measure the threshold for behavioral response to a noxious mechanical stimulus, a mouse was placed on a bench, had their head and body covered with a towel, and was loosely restrained. The tail was positioned between the forceps (2 cm from the tip of the tail) and force was applied gradually by hand at a constant rate (200 g every 2 seconds) until the nociceptive behavioral response occurred. Measurement of the nociceptive threshold was repeated 5 times with intervals of approximately 5 seconds. The maximum and minimum values were excluded from the sets of 5 measurements, and the residual three values were averaged to determine the threshold.

## Definition of behavioral responses

The following three types of behavioral responses were typically observed following pressure application: tail flicking, tail withdrawing, and struggling. Tail flicking was defined by the mouse's tail quickly flicking upwards, followed by a sustained elevation for several seconds. Tail withdrawing was defined by the mouse wiggling its tail in an attempt to free it from the forceps, often resulting in the tail forming an S-like shape. Struggling, on the other hand, was defined by the mouse moving its body in an attempt to free its tail from the forceps. We determined this to be a nocifensive behavior rather than simply a response to restraint because acclimatization, mice very rarely struggled until pressure was applied to the tail. Tail withdrawing sometimes followed struggling and vice versa, but only the first response was recorded.

## Drug application

Remifentanil (Ultiva) was purchased from Janssen Japan. It was dissolved in saline at 10  $\mu\text{g}/\text{mL}$  and injected subcutaneously (100  $\mu\text{g}/\text{kg}$ ) in the neck. In control mice, saline was injected subcutaneously.

## Comparison of response threshold among body parts

To compare the pain response threshold among body parts, we measured the threshold of the distal part (2 cm from the tip) and the proximal part (1 cm from the base) of the tail and the left hind paw. During the loose-restraining session of acclimatization, we gently touched and tapped the tail and the left hind paw. We removed two mice from further measurement because they failed to become acclimatized to the gentle touching of their hind paw. Because the nociceptive threshold of the distal tail was stable during repeated measurements over 5

days, we measured the threshold for distal tail at day 1, proximal tail at day 2, and hind paw at day 3.

## Statistical analysis

All statistical analyses were performed with GraphPad Prism 6 (GraphPad Software, Inc). The criterion for statistical significance was  $p < 0.05$  in all cases.

## Results

### Nociceptive response patterns evoked by calibrated forceps

To evaluate the calibrated forceps for measuring the nociceptive response threshold to noxious mechanical stimuli in mice, we first examined the nociceptive response patterns evoked by pressure application to the tail. Under our experimental conditions, we observed three types of nociceptive behaviors: tail flicking, tail withdrawing, and struggling (*see* Definition of behavioral responses in [Materials and methods](#)). Vocalization was not observed during measurements. [Fig 1](#) plots the distribution of nociceptive thresholds for each behavioral response. The threshold for tail flicking was significantly lower than tail withdrawing or struggling. Also, the frequency of tail flicking was significantly lower than the other responses. As a result, we decided to employ only the response thresholds for tail withdrawing and struggling for further analyses.

### Effect of acclimatization on the pincher test

To evaluate the effect of acclimatization on the measurement of the mechanical nociception threshold using calibrated forceps, we compared the distribution of the threshold between

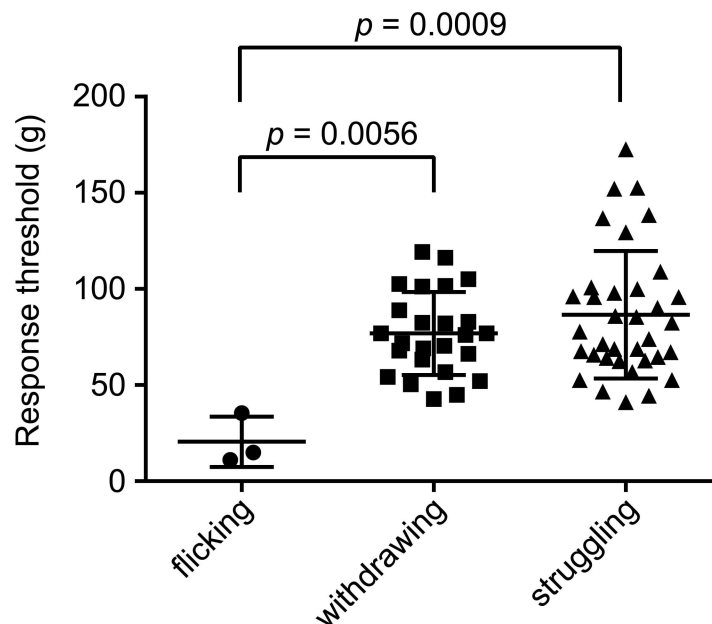

**Fig 1. Three types of nociceptive behavior evoked by calibrated forceps.** The response thresholds for the three types of nociceptive responses were plotted. One-way ANOVA with Tukey's multiple comparison test revealed that the threshold of tail flicking was significantly lower than that of withdrawing ( $p = 0.0056$ ) or struggling ( $p = 0.0009$ ). The frequency of the tail flicking response was significantly lower than the other responses (3 out of 63 responses from 6 mice,  $p < 0.001$ ,  $\chi^2$ -squared test). Bars indicate mean  $\pm$  SEM.

doi:10.1371/journal.pone.0172461.g001

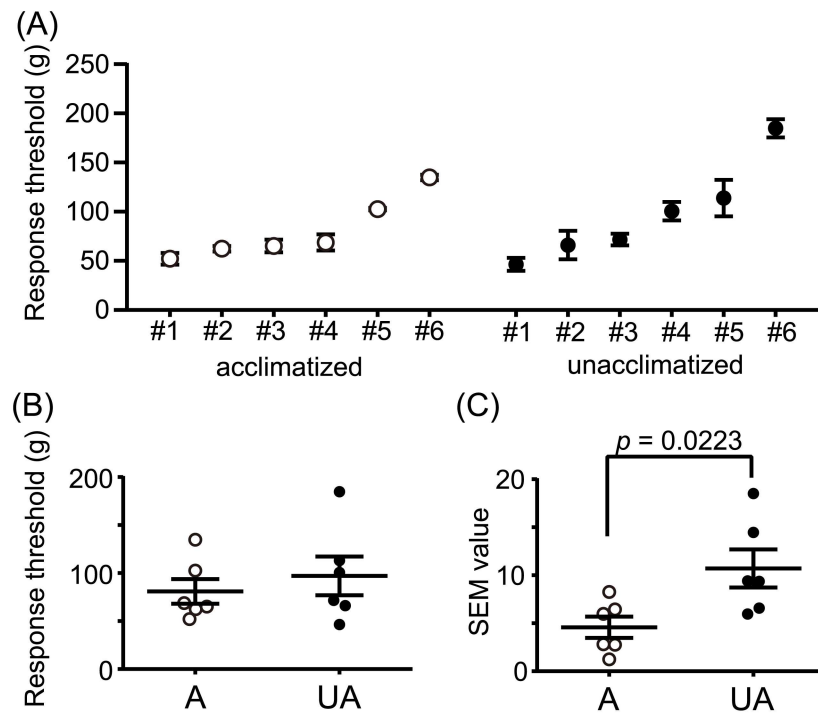

**Fig 2. Effects of acclimatization on the nociceptive response threshold evoked by calibrated forceps.** (A) The threshold distribution of acclimatized (open circles) and unacclimatized (filled circles) mice ( $n = 6$ , respectively) were plotted. (B) The mean values of the threshold were replotted. The distribution was not significantly different between the two groups ( $t = 0.6747$ ,  $df = 10$ ,  $p = 0.5152$ , unpaired t test). (C) The SEM values of the thresholds were replotted. The value was significantly lower in acclimatized mice ( $t = 2.700$ ,  $df = 10$ ,  $p = 0.0223$ , unpaired t test). Bars indicate mean  $\pm$  SEM. A, acclimatized group; UA, unacclimatized group

doi:10.1371/journal.pone.0172461.g002

acclimatized and non-acclimatized mice. Fig 2A shows mean  $\pm$  SEM of the threshold in acclimatized and unacclimatized mice. Though the mean values of the threshold were not significantly different between the two groups (Fig 2B), the SEM values were significantly lower in acclimatized mice (Fig 2C). These data conclude that our acclimatization protocols increase the precision of the threshold values obtained from the limited number of repeated measurements.

### Stable nociceptive threshold under repeated measurements over 5 days

Next, we measured the threshold daily for 5 consecutive days to examine the effect of repeated measurements. Fig 3 shows the time course of the threshold during the 5 days. There were no significant changes in the threshold. These data conclude that the response threshold to application of pressure to the tail was stable for a minimum of 5 days without any carryover effects.

### Evaluation of the calibrated forceps for measuring the rapid change of the threshold

To examine whether the calibrated forceps were able to detect rapid changes in the mechanical nociceptive threshold, we measured the threshold every 5 minutes following a subcutaneous injection of remifentanyl (100  $\mu\text{g}/\text{kg}$ ), a short-acting analgesic. Fig 4 shows the time courses of the thresholds. The threshold was significantly different between the remifentanyl-treated group and the control group. A post-hoc Sidak's multiple comparison test indicated that the

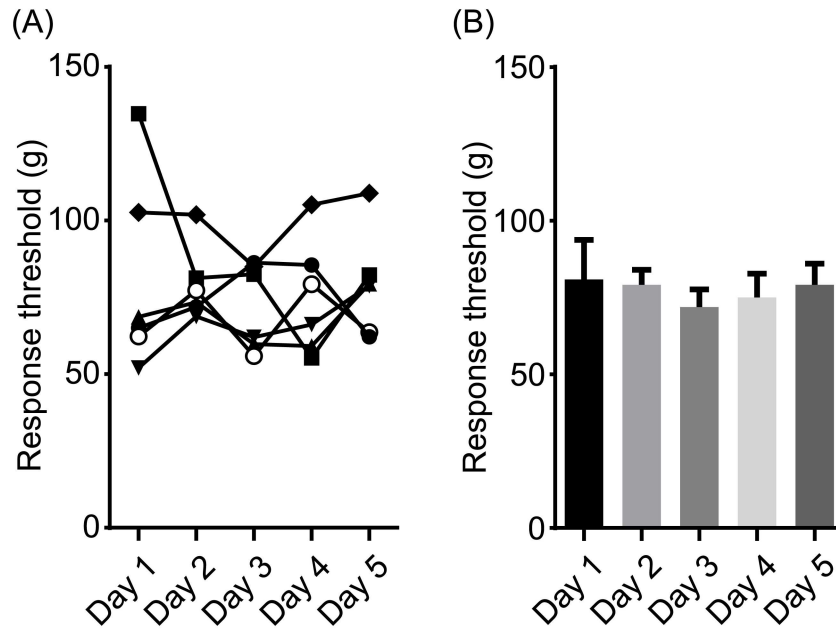

**Fig 3. The threshold for nociceptive response measured by calibrated forceps was stable for 5 days.** (A) Time courses of the nociceptive response threshold of 6 mice over 5 days. A repeated-measured one-way ANOVA revealed that there was no significant difference among days ( $F_{4,20} = 0.3240$ ,  $p = 0.8585$ ). (B) The thresholds were replotted as the mean  $\pm$  SEM for 6 animals for each day.

doi:10.1371/journal.pone.0172461.g003

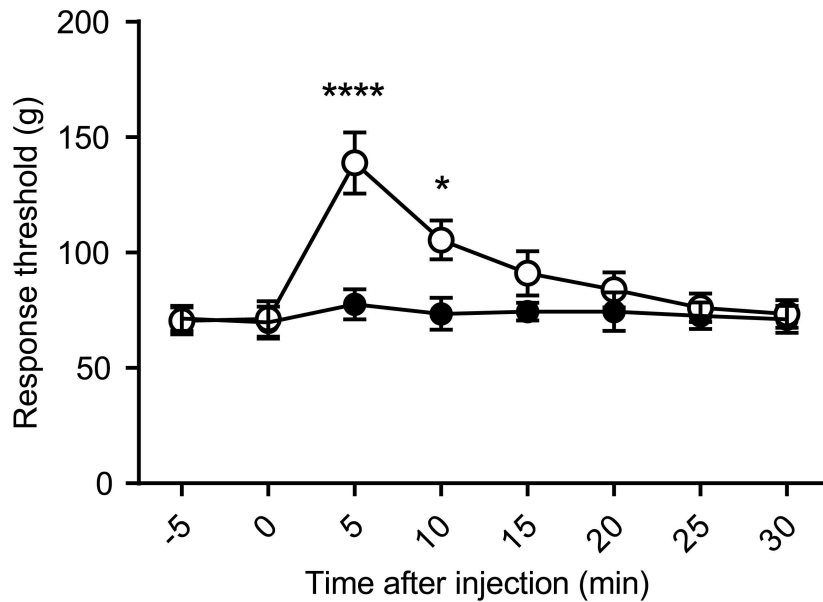

**Fig 4. Rapid change in the mechanical nociception threshold induced by remifentanyl treatment.** Traces show the time course of the threshold of eight consecutive measurements with 5 minute intervals. Time 0 indicates the subcutaneous injection of remifentanyl (open circle) or saline (filled circle). A repeated measures two-way ANOVA with Bonferroni multiple comparison test indicated that the threshold significantly increased at 5 and 10 minutes after remifentanyl injection (\*\*\*\* indicated  $p < 0.0001$ , \* indicated  $p = 0.0252$ ). Data are represented as mean  $\pm$  SEM.  $n = 6$  for each group.

doi:10.1371/journal.pone.0172461.g004

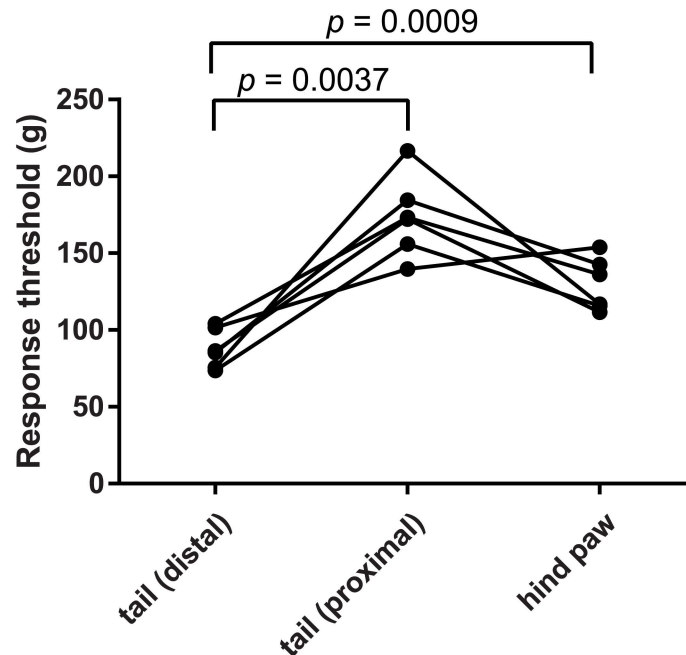

**Fig 5. The distal part of the tail showed lower mechanical nociceptive threshold than the proximal part of the tail or the hind paw.** Plots show the distribution of the threshold among the 3 body parts (distal tail, proximal tail, and hind paw) from six animals. A repeated-measures one-way ANOVA with Tukey's multiple comparison test indicated that the threshold of the distal tail was significantly lower than that of the proximal tail or the hind paw (\*\*\*) indicated  $p = 0.0009$ , \*\* indicated  $p = 0.0037$ ). Note that the threshold of hind paw tended to be lower than that of the proximal tail ( $p = 0.071$ ).

doi:10.1371/journal.pone.0172461.g005

threshold significantly increased at the 5 and 10 minute time points after remifentanyl injection. Our data indicate that the calibrated forceps are suitable to assess a rapid change in the mechanical nociceptive threshold that may be induced by a short-acting analgesic.

### Comparison of the threshold at the distal part of the tail, the proximal part of the tail, and the hind paw using the calibrated forceps

To examine the difference in the mechanical nociceptive threshold of body parts generally favored for performing pain tests, we measured and compared the threshold of the distal part of the tail, the proximal part of the tail, and the hind paw using calibrated forceps. Fig 5 shows the distribution of the threshold at the three body parts. The threshold was significantly different among the body parts. A post-hoc Tukey's multiple comparison test indicated that the threshold of the distal part of tail was significantly lower than that of the proximal part of the tail or the hind paw.

### Discussion

In our preliminary trials, we originally planned to measure the nociceptive threshold in the hind paws of mice. However, even though the mice were acclimatized for 5 days, they always buried their hind paws beneath their bodies during the repetitive measurements required for high time resolution. In order to get a measurement, the hind paw needed to be forcibly pulled out, often causing a vocalization that suggested high stress. Therefore, we switched to measuring the nociceptive threshold in the tail for high time-resolution. It should be noted that we were able to measure the steady-state threshold of the mouse hind paw (Fig 5) as previously



reported [19–21]. To apply the calibrated forceps to the hind paws of mice in a way that is necessary for a high time resolution, further refinement of acclimatization protocols or of holding procedures may be necessary.

Repeated daily measurements of the nociceptive threshold with calibrated forceps over 5 days resulted in stable and reliable values (Fig 3). These data suggest that the calibrated forceps could be used for repeated assessments within a few days without any carryover effects. Furthermore, the device may be useful for assessing the tail neuropathic pain by the combination of surgical injury of spinal nerve innervating the tail [24, 25].

The calibrated forceps also traced the rapid change of the mechanical nociceptive threshold induced by a short-acting analgesic (Fig 4). In the past, rapid changes in the nociceptive threshold have been examined by thermal tests. For example, the radiant heat test was used to examine the time course of antinociceptive effects caused by remifentanyl in high time resolution (< 15 minutes) [26–28]. Our data suggest that the calibrated forceps may enable us to compare the effects of short-acting analgesics on the time course of mechanical nociception to the time course of thermal nociception.

One of the technical limitations in this study was the requirement of loose-restraint during measurement which is unnecessary in the von Frey test. It is well established that the 1 hour restraint stress evoked by immobilization in a restraining device induces stress-induced analgesia [29–31]. Although our restraining method could be considered as loose because the animals were able to move easily under the towel, we could not completely rule out the effect of stress.

In summary, our data demonstrate that the calibrated forceps are a stable and reliable tool to measure the mechanical nociceptive threshold at steady-state in mouse tail. Furthermore, the calibrated forceps were also well-suited to assess the rapid change in the mechanical nociceptive threshold caused by Remifentanyl with 5 minute intervals which suggests that it may be useful for characterizing other short-acting analgesics as well.

## Acknowledgments

We thank Prof. T. Yasaka for critically reading the manuscript, Prof. M. Horiuchi for valuable discussion about statistical analysis, Prof. T. Kurihara for valuable comments about mechanical nociception assays and helpful discussion, Mr. J. Pauli for English editing, and members of the Kagoshima University Department of Physiology and Anesthesiology for useful discussion. We also acknowledge the Joint Research Laboratory and Laboratory of Animal Science at the Kagoshima University Graduate School of Medical and Dental Sciences for use of their facilities.

## Author Contributions

**Conceptualization:** HK.

**Data curation:** HK TK.

**Formal analysis:** HK.

**Funding acquisition:** HK TK.

**Investigation:** HK.

**Methodology:** HK.

**Project administration:** HK.

**Resources:** HK TK.



**Supervision:** TK YK.

**Validation:** TK.

**Visualization:** HK.

**Writing – original draft:** HK.

**Writing – review & editing:** TK YK.

## References

1. Mogil JS, Davis KD, Derbyshire SW. The necessity of animal models in pain research. *Pain*. 2010; 151(1):12–7. Epub 2010/08/11. doi: [10.1016/j.pain.2010.07.015](https://doi.org/10.1016/j.pain.2010.07.015) PMID: [20696526](https://pubmed.ncbi.nlm.nih.gov/20696526/)
2. Kieffer BL, Gavériaux-Ruff C. Exploring the opioid system by gene knockout. *Prog Neurobiol*. 2002; 66(5):285–306. PMID: [12015197](https://pubmed.ncbi.nlm.nih.gov/12015197/)
3. Scherrer G, Imamachi N, Cao YQ, Contet C, Mennicken F, O'Donnell D, et al. Dissociation of the opioid receptor mechanisms that control mechanical and heat pain. *Cell*. 2009; 137(6):1148–59. Epub 2009/06/16. doi: [10.1016/j.cell.2009.04.019](https://doi.org/10.1016/j.cell.2009.04.019) PMID: [19524516](https://pubmed.ncbi.nlm.nih.gov/19524516/)
4. Barrot M. Tests and models of nociception and pain in rodents. *Neuroscience*. 2012; 211:39–50. <http://dx.doi.org/10.1016/j.neuroscience.2011.12.041>. PMID: [22244975](https://pubmed.ncbi.nlm.nih.gov/22244975/)
5. D'amour FE, Smith DL. A method for determining loss of pain sensation. *J Pharmac Exp Ther*. 1941; 72:74–9.
6. O'Callaghan JP, Holtzman SG. Quantification of the analgesic activity of narcotic antagonists by a modified hot-plate procedure. *J Pharmacol and Exp Ther*. 1975; 192(3):497–505.
7. Woolfe G, Macdonald AD. The evaluation of the analgesic action of pethidine hydrochloride (DEMEROL). *J Pharmacol Exp Ther*. 1944; 80(3):300–7.
8. Hargreaves K, Dubner R, Brown F, Flores C, Joris J. A new and sensitive method for measuring thermal nociception in cutaneous hyperalgesia. *Pain*. 1988; 32(1):77–88. PMID: [3340425](https://pubmed.ncbi.nlm.nih.gov/3340425/)
9. Dubuisson D, Dennis SG. The formalin test: a quantitative study of the analgesic effects of morphine, meperidine, and brain stem stimulation in rats and cats. *Pain*. 1977; 4(2):161–74. PMID: [564014](https://pubmed.ncbi.nlm.nih.gov/564014/)
10. Tjolsen A, Berge OG, Hunskaar S, Rosland JH, Hole K. The formalin test: an evaluation of the method. *Pain*. 1992; 51(1):5–17. PMID: [1454405](https://pubmed.ncbi.nlm.nih.gov/1454405/)
11. Bradman MJ, Ferrini F, Salio C, Merighi A. Practical mechanical threshold estimation in rodents using von Frey hairs/Semmes-Weinstein monofilaments: Towards a rational method. *J Neurosci Methods*. 2015; 255:92–103. doi: [10.1016/j.jneumeth.2015.08.010](https://doi.org/10.1016/j.jneumeth.2015.08.010) PMID: [26296284](https://pubmed.ncbi.nlm.nih.gov/26296284/)
12. Callahan BL, Gil AS, Levesque A, Mogil JS. Modulation of mechanical and thermal nociceptive sensitivity in the laboratory mouse by behavioral state. *J Pain*. 2008; 9(2):174–84. doi: [10.1016/j.jpain.2007.10.011](https://doi.org/10.1016/j.jpain.2007.10.011) PMID: [18088557](https://pubmed.ncbi.nlm.nih.gov/18088557/)
13. Randall LO, Selitto JJ. A method for measurement of analgesic activity on inflamed tissue. *Arch Int Pharmacodyn Ther*. 1957; 111(4):409–19. PMID: [13471093](https://pubmed.ncbi.nlm.nih.gov/13471093/)
14. Anseloni VC, Ennis M, Lidow MS. Optimization of the mechanical nociceptive threshold testing with the Randall-Selitto assay. *J Neurosci Methods*. 2003; 131(1–2):93–7. PMID: [14659828](https://pubmed.ncbi.nlm.nih.gov/14659828/)
15. Taiwo YO,Coderre TJ, Levine JD. The contribution of training to sensitivity in the nociceptive paw-withdrawal test. *Brain Res*. 1989; 487(1):148–51. PMID: [2752281](https://pubmed.ncbi.nlm.nih.gov/2752281/)
16. Luis-Delgado OE, Barrot M, Rodeau JL, Schott G, Benbouzid M, Poisbeau P, et al. Calibrated forceps: a sensitive and reliable tool for pain and analgesia studies. *J Pain*. 2006; 7(1):32–9. doi: [10.1016/j.jpain.2005.07.011](https://doi.org/10.1016/j.jpain.2005.07.011) PMID: [16414552](https://pubmed.ncbi.nlm.nih.gov/16414552/)
17. Skyba DA, Radhakrishnan R, Sluka KA. Characterization of a method for measuring primary hyperalgesia of deep somatic tissue. *J Pain*. 2005; 6(1):41–7. doi: [10.1016/j.jpain.2004.10.002](https://doi.org/10.1016/j.jpain.2004.10.002) PMID: [15629417](https://pubmed.ncbi.nlm.nih.gov/15629417/)
18. Cui JG, Meyerson BA, Linderth B. Opposite effects of spinal cord stimulation in different phases of carrageenan-induced hyperalgesia. *Eur J Pain*. 1999; 3(4):365–74. PMID: [10700364](https://pubmed.ncbi.nlm.nih.gov/10700364/)
19. Latremoliere A, Latini A, Andrews N, Cronin SJ, Fujita M, Gorska K, et al. Reduction of neuropathic and inflammatory pain through inhibition of the tetrahydrobioterin pathway. *Neuron* 2015; 86(6):1393–406. doi: [10.1016/j.neuron.2015.05.033](https://doi.org/10.1016/j.neuron.2015.05.033) PMID: [26087165](https://pubmed.ncbi.nlm.nih.gov/26087165/)
20. Sluka KA, O'Donnell JM, Danielson J, Rasmussen LA. Regular physical activity prevents development of chronic pain and activation of central neurons. *J Appl Physiol* 2013; 114(6):725–33 doi: [10.1152/jappphysiol.01317.2012](https://doi.org/10.1152/jappphysiol.01317.2012) PMID: [23271699](https://pubmed.ncbi.nlm.nih.gov/23271699/)

21. Sluka KA, Rasmussen LA. Fatiguing exercise enhances hyperalgesia to muscle inflammation. *Pain* 2010;188–97.
22. Egan TD, Lemmens HJ, Fiset P, Hermann DJ, Muir KT, Stanski DR, et al. The pharmacokinetics of the new short-acting opioid remifentanil (GI87084B) in healthy adult male volunteers. *Anesthesiol.* 1993; 79(5):881–92.
23. Glass PS, Hardman D, Kamiyama Y, Quill TJ, Marton G, Donn KH, et al. Preliminary pharmacokinetics and pharmacodynamics of an ultra-short-acting opioid: remifentanil (GI87084B). *Anesth Analg.* 1993; 77(5):1031–40. PMID: [8105723](#)
24. Sung B, Loh HH, Wei L. Association of kappa opioid receptor mRNA upregulation in dorsal root ganglia with mechanical allodynia in mice following nerve injury. *Neurosci. Lett.* 2000; 291(3):163–6. PMID: [10984632](#)
25. Back SK, Sung B, Hong SK, Na HS. A mouse model for peripheral neuropathy produced by a partial injury of the nerve supplying the tail. *Neurosci Lett.* 2002; 322(3):153–6. PMID: [11897161](#)
26. Bevans T, Deering-Rice C, Stockmann C, Light A, Reilly C, Sakata DJ. Inhaled Remifentanil in Rodents. *Anesth Analg.* 2016.
27. Hutchinson MR, Northcutt AL, Hiranita T, Wang X, Lewis SS, Thomas J, et al. Opioid activation of toll-like receptor 4 contributes to drug reinforcement. *J Neurosci.* 2012; 32(33):11187–200. doi: [10.1523/JNEUROSCI.0684-12.2012](#) PMID: [22895704](#)
28. Buerkle H, Yaksh TL. Comparison of the spinal actions of the mu-opioid remifentanil with alfentanil and morphine in the rat. *Anesthesiol.* 1996; 84(1):94–102.
29. Butler RK, Fin DP. Stress-induced analgesia. *Prog Neurobiol.* 2009; 88(3):184–202. doi: [10.1016/j.pneurobio.2009.04.003](#) PMID: [19393288](#)
30. Calcagnetti DJ, Stafinsky JL, Crisp T. A single restraint stress exposure potentiates analgesia induced by intrathecally administered DAGO. *Brain Res.* 1992; 592(1–2):305–9. PMID: [1450919](#)
31. Costa A, Smeraldi A, Tassorelli C, Greco R, Nappi G. Effects of acute and chronic restraint stress on nitroglycerin-induced hyperalgesia in rats. *Neurosci Lett* 2005; 383(1–2):7–11. doi: [10.1016/j.neulet.2005.03.026](#) PMID: [15936504](#)
